# Supplementary figures and images for: A Consideration of Optimal Head Position in Transsylvian Selective Amygdalohippocampectomy
Source: PubMed Central journal article supplement — Neurol Med Chir (Tokyo). 2023 Apr 13;63(7):265–72. doi: 10.2176/jns-nmc.2022-0283 (PMC10406460; doi:10.2176/jns-nmc.2022-0283), 2023-04-13

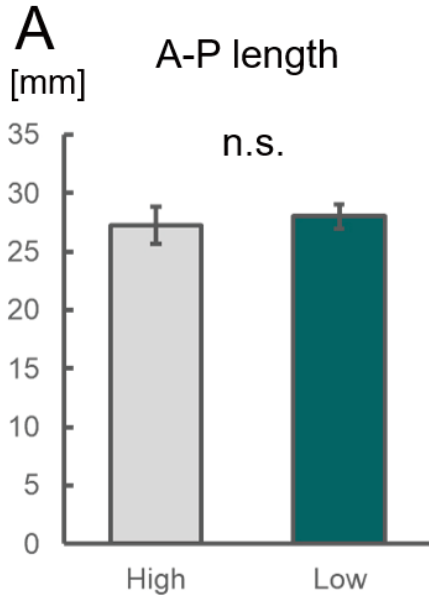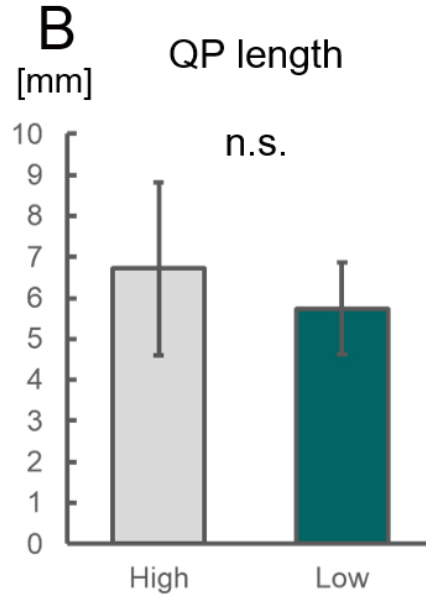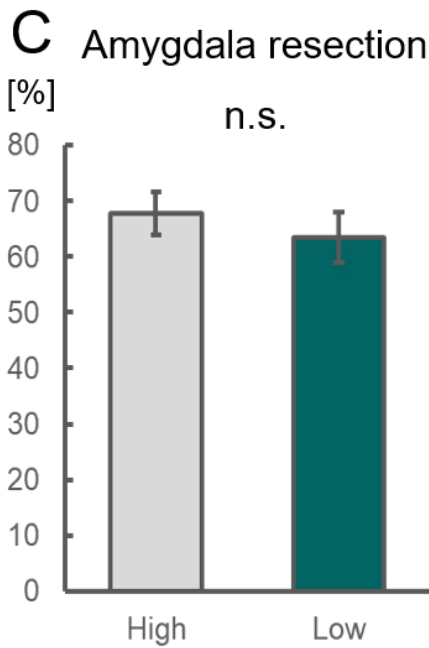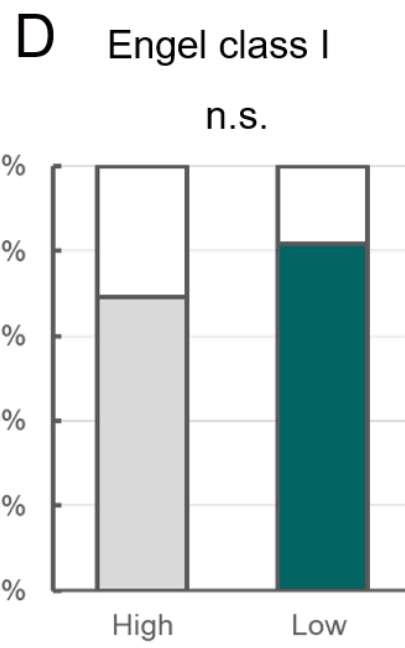

Supplement: 1349-8029-63-0265-s001.pdf [file 1349-8029-63-0265-s001.pdf]

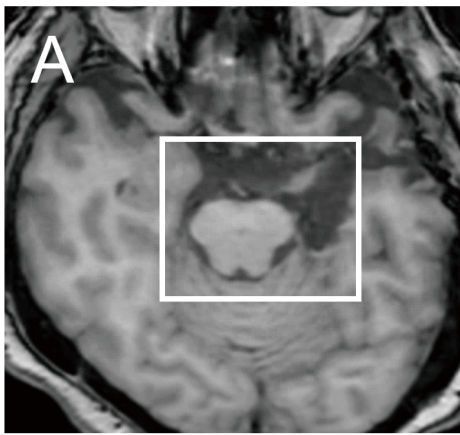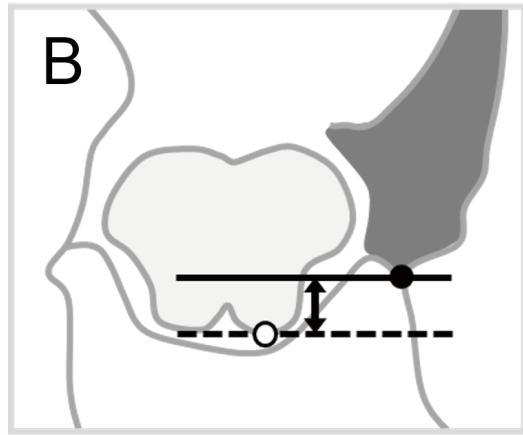

Supplement: 1349-8029-63-0265-s002.pdf [file 1349-8029-63-0265-s002.pdf]
